# Supplementary material
Source: PubMed Central journal article supplement (PMC3947313)
Supplement: NIHMS529710-supplement-Supp_FigS1_Methods.pdf [file NIHMS529710-supplement-Supp_FigS1_Methods.pdf]

Supplementary Material for:

**Molecular mechanism of ERK dephosphorylation by striatal-enriched protein tyrosine phosphatase (STEP)**

Rong Li<sup>1,8#</sup>, Di-Dong Xie<sup>1,2,8#</sup>, Jun-hong Dong<sup>1,8,12#</sup>, Hui Li<sup>1,3,8</sup>, Kang-shuai Li<sup>1,6,8</sup>,  
Jing Su<sup>1,3,8</sup>, Lai-Zhong Chen<sup>4</sup>, Yun-Fei Xu<sup>1,6,8</sup>, Hong-Mei Wang<sup>1,3,8</sup>, Zheng Gong<sup>1,5,8</sup>,  
Guo-Ying Cui<sup>1,8</sup>, Xiao Yu<sup>1,3,8</sup>, Kai Wang<sup>3,8</sup>, Wei Yao<sup>3,8</sup>, Tao Xin<sup>2,8</sup>, Min-Yong Li<sup>4</sup>,  
Kun-Hong Xiao<sup>7</sup>, Xiao-fei An<sup>9</sup>, Yuqing Huo<sup>11</sup>, Zhi-gang Xu<sup>8,10</sup>, Jin-Peng Sun<sup>1,2,8\*</sup>, Qi  
Pang<sup>2,8\*</sup>

**Affiliations:**

<sup>1</sup> Key Laboratory Experimental Teratology of the Ministry of Education and Department of Biochemistry and Molecular Biology, Shandong University, School of Medicine, Jinan, Shandong, 250012, China;

<sup>2</sup> Provincial Hospital affiliated to Shandong University, Jinan, Shandong, 250012, China

<sup>3</sup> Department of Physiology, Shandong University, School of Medicine, Jinan, Shandong, 250012, China;

<sup>4</sup> School of Pharmaceutical Sciences, Shandong University, Jinan, Shandong, 250012, China

<sup>5</sup> Weihai campus, Shandong University, Weihai, Shandong, 264209, China;

<sup>6</sup> Qilu Hospital, Shandong University, Jinan, Shandong, 250012, China;

<sup>7</sup> Department of Medicine, Duke University Medical Center, Durham, NC 27710, USA

<sup>8</sup> Shandong Provincial School Key laboratory for Protein Science of Chronic Degenerative Diseases, Jinan, Shandong, 250012, China.

<sup>9</sup> Drug Discovery Center, Key Laboratory of Chemical Genomics, Peking University Shenzhen Graduate School, Shenzhen, China, 518055

<sup>10</sup> Shandong University, School of Life Sciences, Jinan, Shandong, 250021, China

<sup>11</sup> Vascular Biology Center, Department of Cellular Biology and Anatomy, Medical

**Supplemental-Figure S1: Bar graph and statistical analysis of the relative catalytic activity of STEP active-site mutants for four different substrates, pNPP, the phospho-peptides derived from phospho-ERK2-pT<sup>202</sup>pY<sup>204</sup> and pp-p38-pT<sup>180</sup>pY<sup>182</sup>, and full-length phospho-ERK protein, compared to wild-type STEP.**

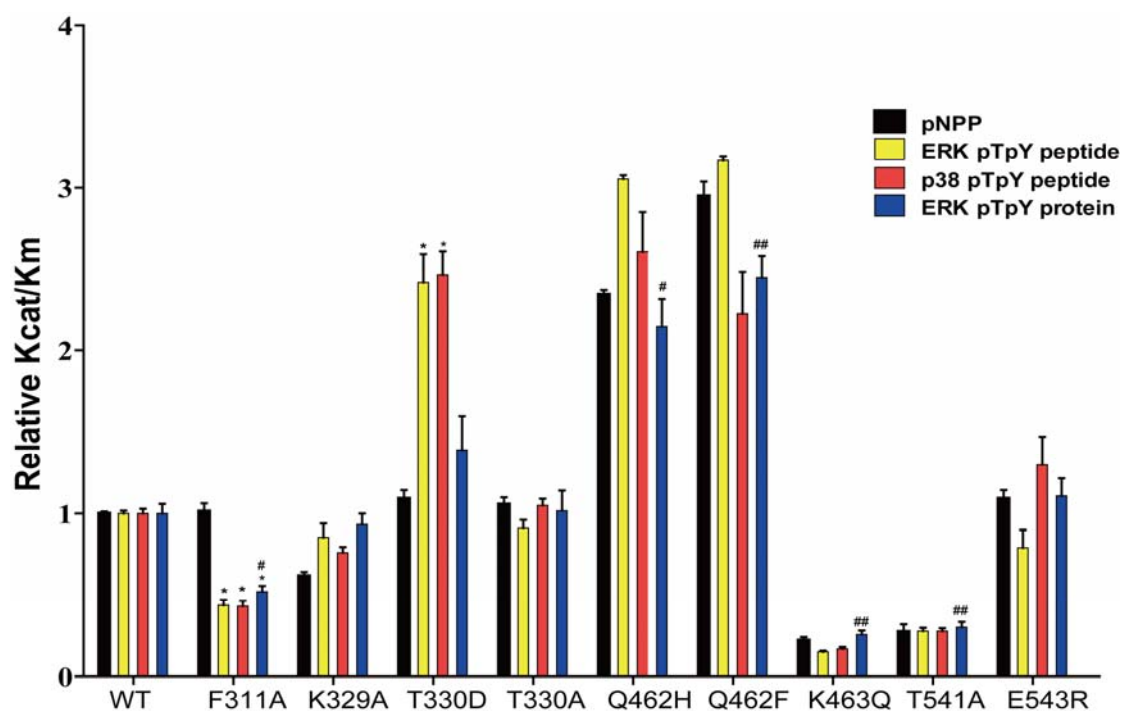

(\*represents  $P < 0.05$  compared to each mutant relative catalytic activity for pNPP. # represents  $P < 0.05$ , ##,  $P < 0.01$  compared to wild type catalytic activity for phospho-ERK protein. The data are the average of at least three independent measurements.)

## Supplemental Materials and Methods

### Molecular cloning and mutagenesis

The coding sequence of human STEP<sub>46</sub> (Swiss-Prot entry P54829) was

sub-cloned into the PET15b bacterial expression vector with an N-terminal hexa-histidine purification tag (MGSSHHHHHH), as described previously (Sun *et al.* 2007). The N-terminal deletions were generated by SLIC methods (Li & Elledge 2012). All point mutations of STEP were produced using the QuikChange Site-Directed Mutagenesis Kit (Stratagene,U.S.A). The PAGE-purified oligonucleotide primers used for cloning were obtained from Beijing Genomics Institute (China). All constructs were verified by DNA sequencing.

### **Protein expression and purification**

The N-terminal His-tagged recombinant STEP proteins (wild-type and mutants) were expressed and purified as follows. BL21(DE3) cells were transformed with the expression plasmids and cultured in LB medium with vigorous shaking at 37°C. The culture temperature was adjusted to 18°C at OD<sub>600</sub>=0.6, and expression was induced for 12 h with 0.4 mM IPTG at an OD<sub>600</sub> of 0.8. The cells were harvested by centrifugation and re-suspended in lysis buffer (20 mM Tris [pH 8.0], 300 mM NaCl, 1 mM PMSF, and 5 mM imidazole). After centrifugation, the supernatant was incubated with Ni<sup>2+</sup>-NTA resin with end-to-end mixing for 1 hour at 4°C. The beads were collected and washed with 20 ml wash buffer (20 mM Tris [pH 8.0], 300 mM NaCl, and 5 mM imidazole) and eluted with an imidazole gradient (20 mM Tris [pH 8.0], 300 mM NaCl, and 20-200 mM imidazole). The elute was diluted 10-fold in buffer A (20 mM Tris [pH 8.0], 50 mM NaCl, and 2 mM DTT) and loaded onto a 1-ml HiTrap Q FF column. The protein was eluted using a linear gradient from buffer A to 50% buffer B (20 mM Tris [pH 8.0], 1 M NaCl, and 2 mM DTT). The purified proteins were assessed by SDS-PAGE. The proteins were concentrated to 5–10 mg/ml using a 10-kDa cut-off concentrator (Millipore) and stored at -80°C after adjustment with 20% glycerol.

### **Preparation of phospho-ERK2 protein**

Recombinant His-ERK2 and constitutively active MEK1(G7B) were expressed and purified using a procedure similar to that used for His-tagged STEP. Bisphosphorylated ERK2 was prepared and assessed as described previously (Zhao & Zhang 2001). ERK2 (purified, 1 mg/ml) was incubated with 0.1 mg/ml MEK1 in a reaction system of 20 mM HEPES (pH 7.4), 20 mM Mg(OAc)<sub>2</sub>, 100 mM NaCl, 2 mM DTT, and 0.5 mM ATP. The reaction was incubated at 30°C for 90 min with occasional stirring. Phosphorylated ERK2 was loaded onto a Superdex-200 column (GE Healthcare) to remove the free ATP and then further purified using a Mono-Q column.

### **Western blotting**

ERK2 (0.5 μM) was combined with 20 nM phosphatase in 50 mM 3-(N-morpholino)propanesulphonic acid (MOPS), 100 mM NaCl, 0.1 mM EDTA, and 1 mM DTT. The dephosphorylation of phospho-ERK2 by PPM1A was performed by adding 5 mM MnCl<sub>2</sub>. Aliquots of the reaction were withdrawn at the indicated times and then added to tubes containing 2X sample loading buffer. The protein samples were then subjected to SDS-PAGE and transferred to nitrocellulose membranes. The membranes were blocked with 5% BSA and incubated with the appropriate dilution of specific antibodies.

### **Generation of the docking model**

The crystal structures of ERK (PDB ID: 2ERK) and STEP (PDB ID: 2CJZ) were combined together in the software programme HEX 6.3. The molecular minimisation was performed similar to the previous docking model of the PPM1A-phospho-ERK complex (Li *et al.* 2013), with 3000 iterations, in the software programme Desmond 3.1.

## References

- Li, M. Z. and Elledge, S. J. (2012) SLIC: a method for sequence- and ligation-independent cloning. *Methods Mol Biol*, **852**, 51-59.
- Li, R., Gong, Z., Pan, C. et al. (2013) PPM1A functions as an ERK phosphatase. *The FEBS journal*.
- Sun, J. P., Luo, Y., Yu, X., Wang, W. Q., Zhou, B., Liang, F. and Zhang, Z. Y. (2007) Phosphatase activity, trimerization, and the C-terminal polybasic region are all required for PRL1-mediated cell growth and migration. *J Biol Chem*, **282**, 29043-29051.
- Zhao, Y. and Zhang, Z. Y. (2001) The mechanism of dephosphorylation of extracellular signal-regulated kinase 2 by mitogen-activated protein kinase phosphatase 3. *The Journal of biological chemistry*, **276**, 32382-32391.
